# Supplementary material for: Pragmatic method based on on-line leaching and inductively coupled plasma mass spectrometry for risk assessment of the impact of short-term pollution
Source: Royal Society of Chemistry journal article supplement (doi:10.1039/d0ja00447b), 2021-01-01
Supplement: d0ja00447b1.pdf [file d0ja00447b1.pdf]

**Supplementary material for Pragmatic method based on on-line leaching and inductively coupled plasma mass spectrometry for risk assessment of the impact of short-term pollution**

**Table S1.** Amount (kg) of natural toothbrush that can be consumed daily corresponding to the PTDI level of elements based on their bio-accessible concentration

| Element | Unpolluted miswak |       | Polluted miswak |       | Miswak fruits |       |
|---------|-------------------|-------|-----------------|-------|---------------|-------|
|         | Adult             | Child | Adult           | Child | Adult         | Child |
| Cr      | 8                 | 2     | 8               | 2     | 40            | 9     |
| Fe      | 0.4               | 0.08  | 0.22            | 0.1   | 0.3           | 0.1   |
| Ni      | 203               | 44    | 208             | 44    | 582           | 125   |
| Cu      | 6                 | 1     | 5               | 1     | 1             | 0.23  |
| Zn      | 8                 | 2     | 1               | 0.3   | 1.3           | 0.3   |
| As      | 16                | 3     | 10              | 2     | 10            | 2.2   |
| Cd      | 37                | 8     | 16              | 3     | 26            | 5     |
| Pb      | 70                | 15    | 82              | 18    | 40            | 8.5   |

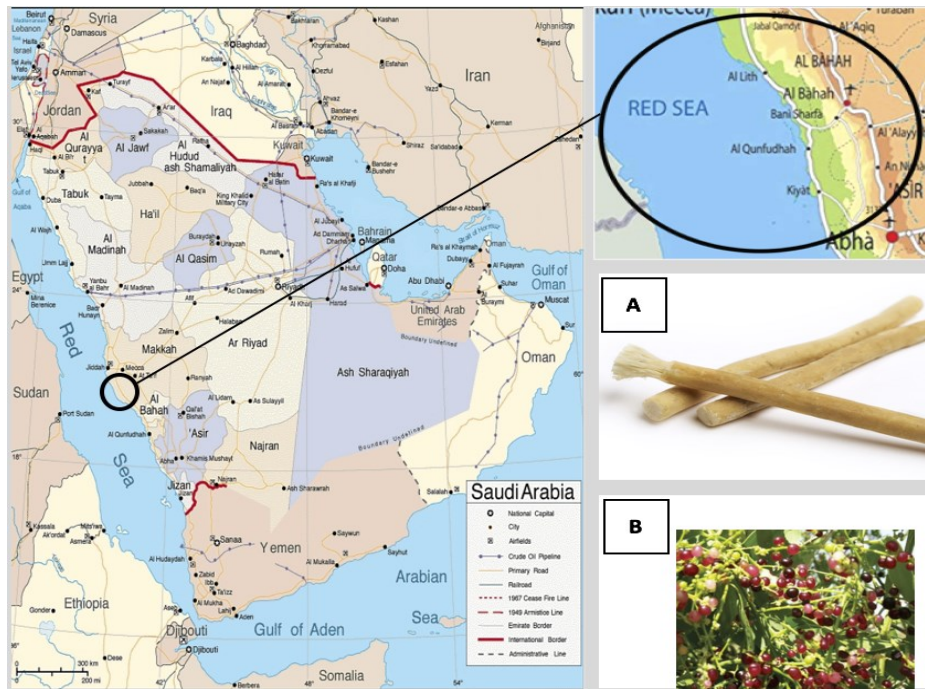

**Figure S1.** Map of Saudi Arabia showing the sample collection site, with photographs of a miswak brush (A) and fruits on a miswak tree (B).

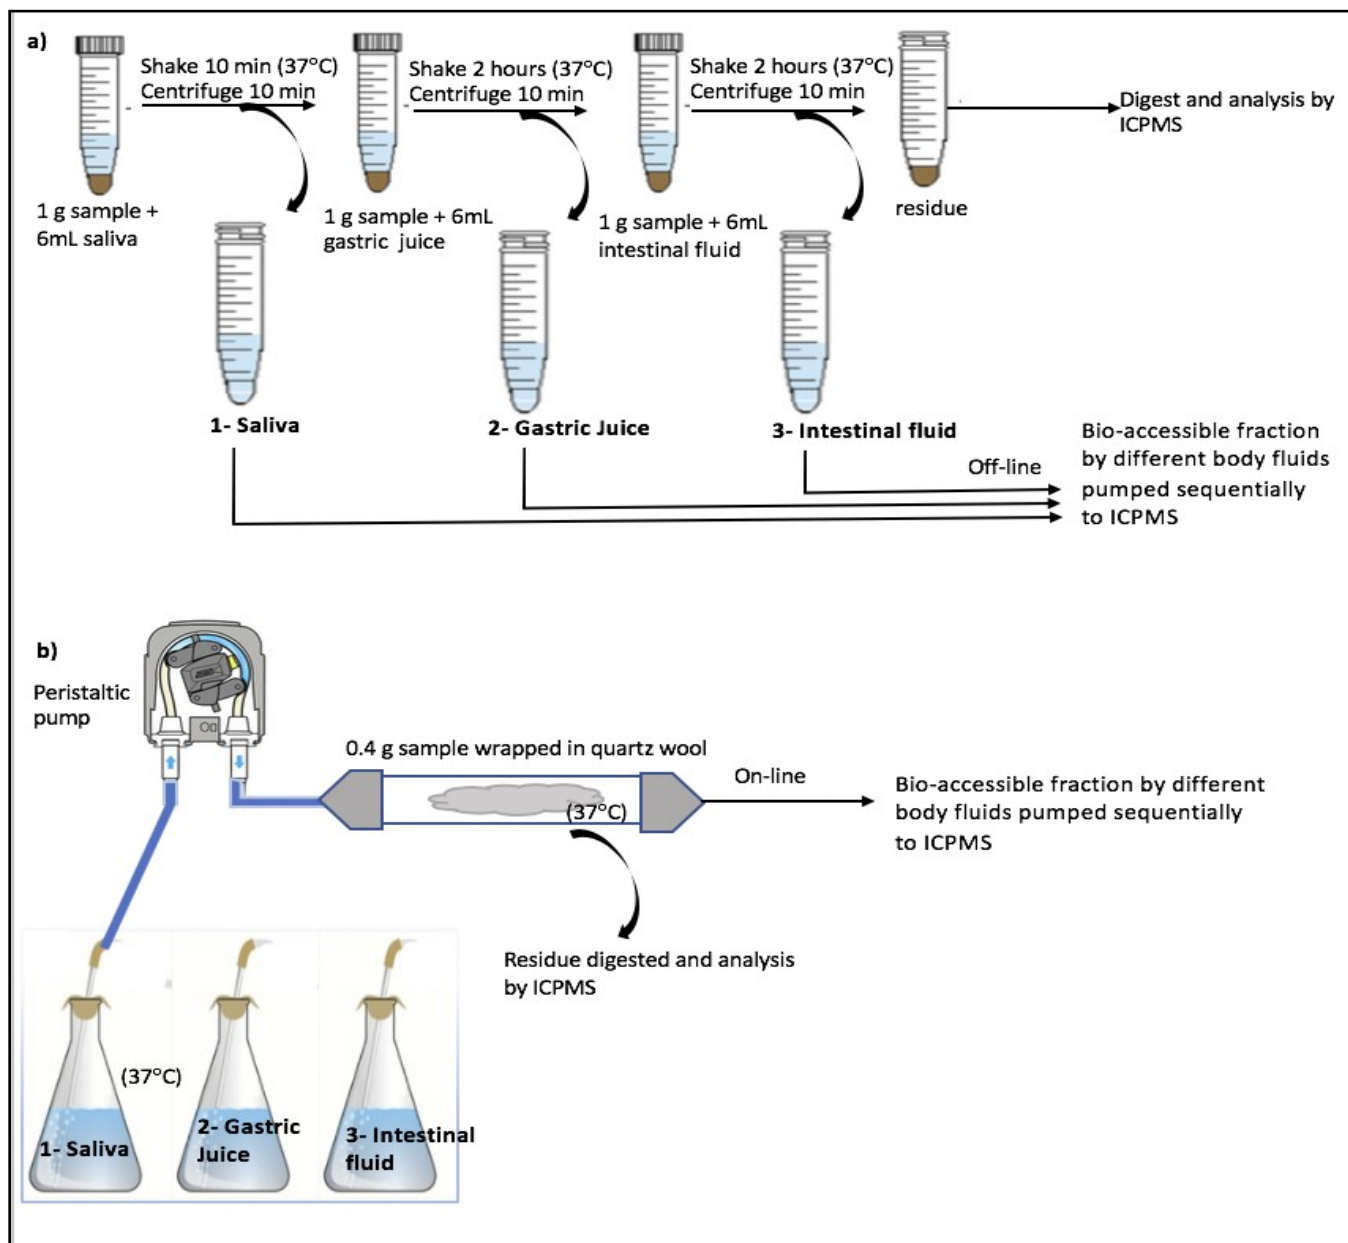

**Figure S2.** Schematic representation of in vitro bio-accessibility assessment by: a) batch method and b) on-line leaching method.

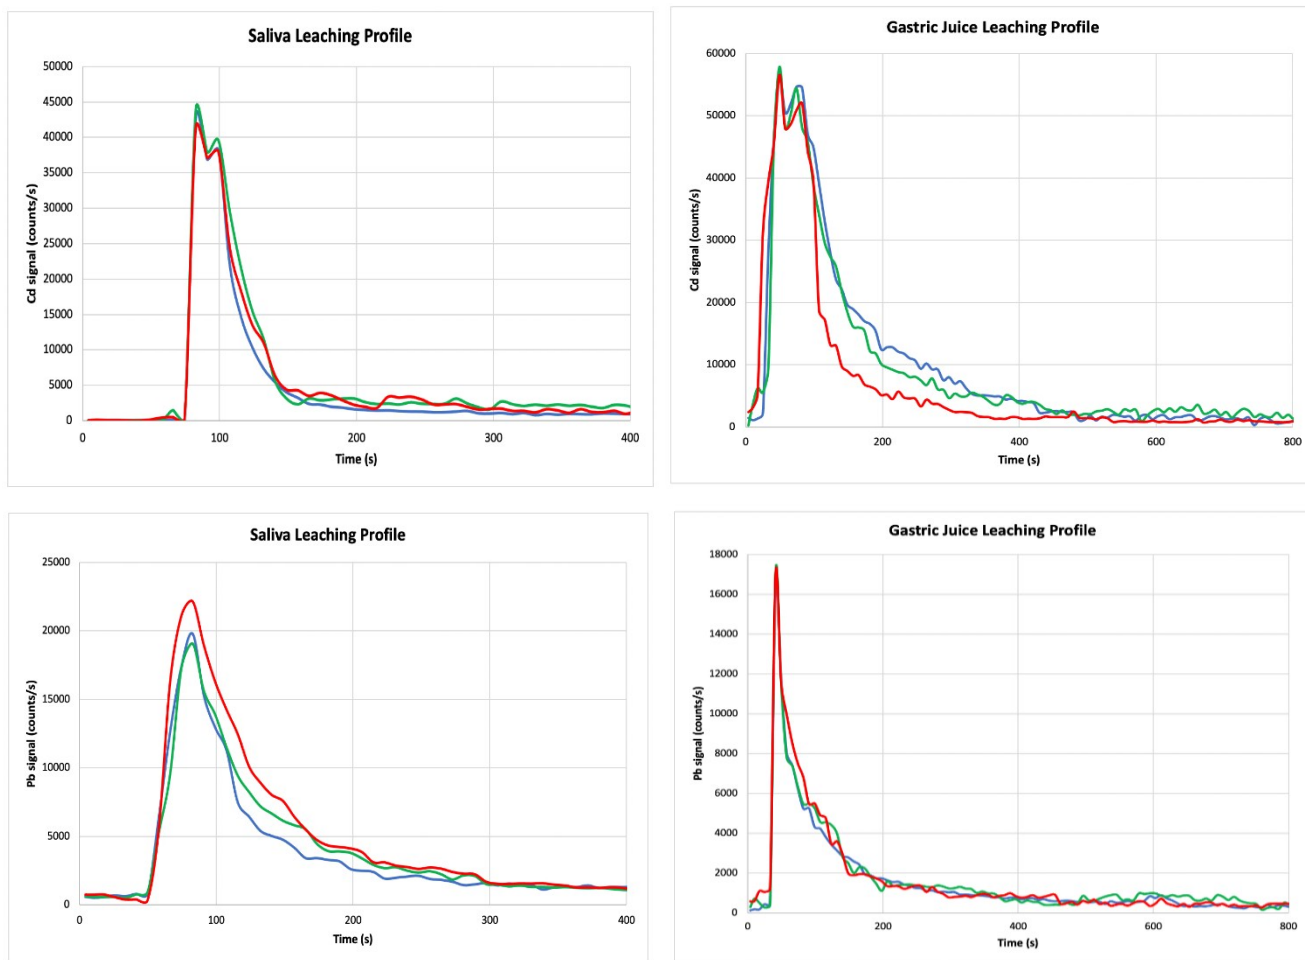

**Figure S3.** Triplicate temporal profiles obtained during on-line leaching of polluted miswak while continuously monitoring the release of Cd (top) and Pb (bottom) by ICPMS.

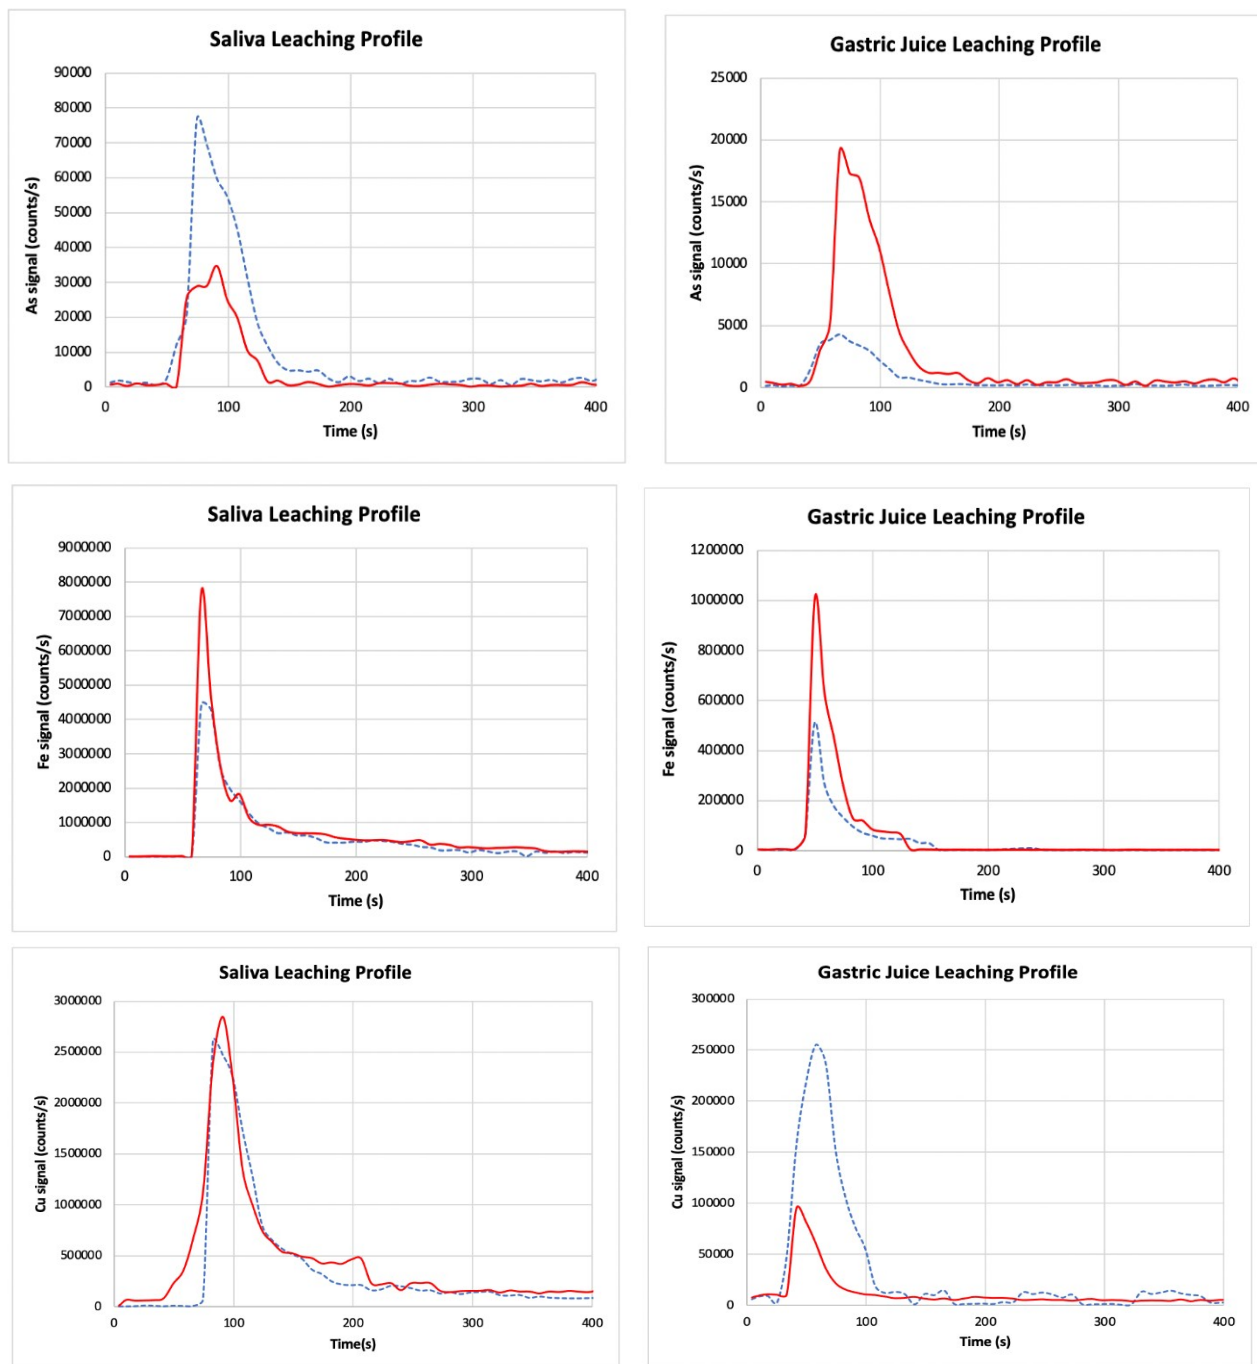

**Figure S4.** Real-time temporal profiles obtained by ICPMS for As, Fe and Cu during on-line leaching with artificial saliva and gastric juice for unpolluted miswak (dashed blue line) and polluted miswak (full red line)

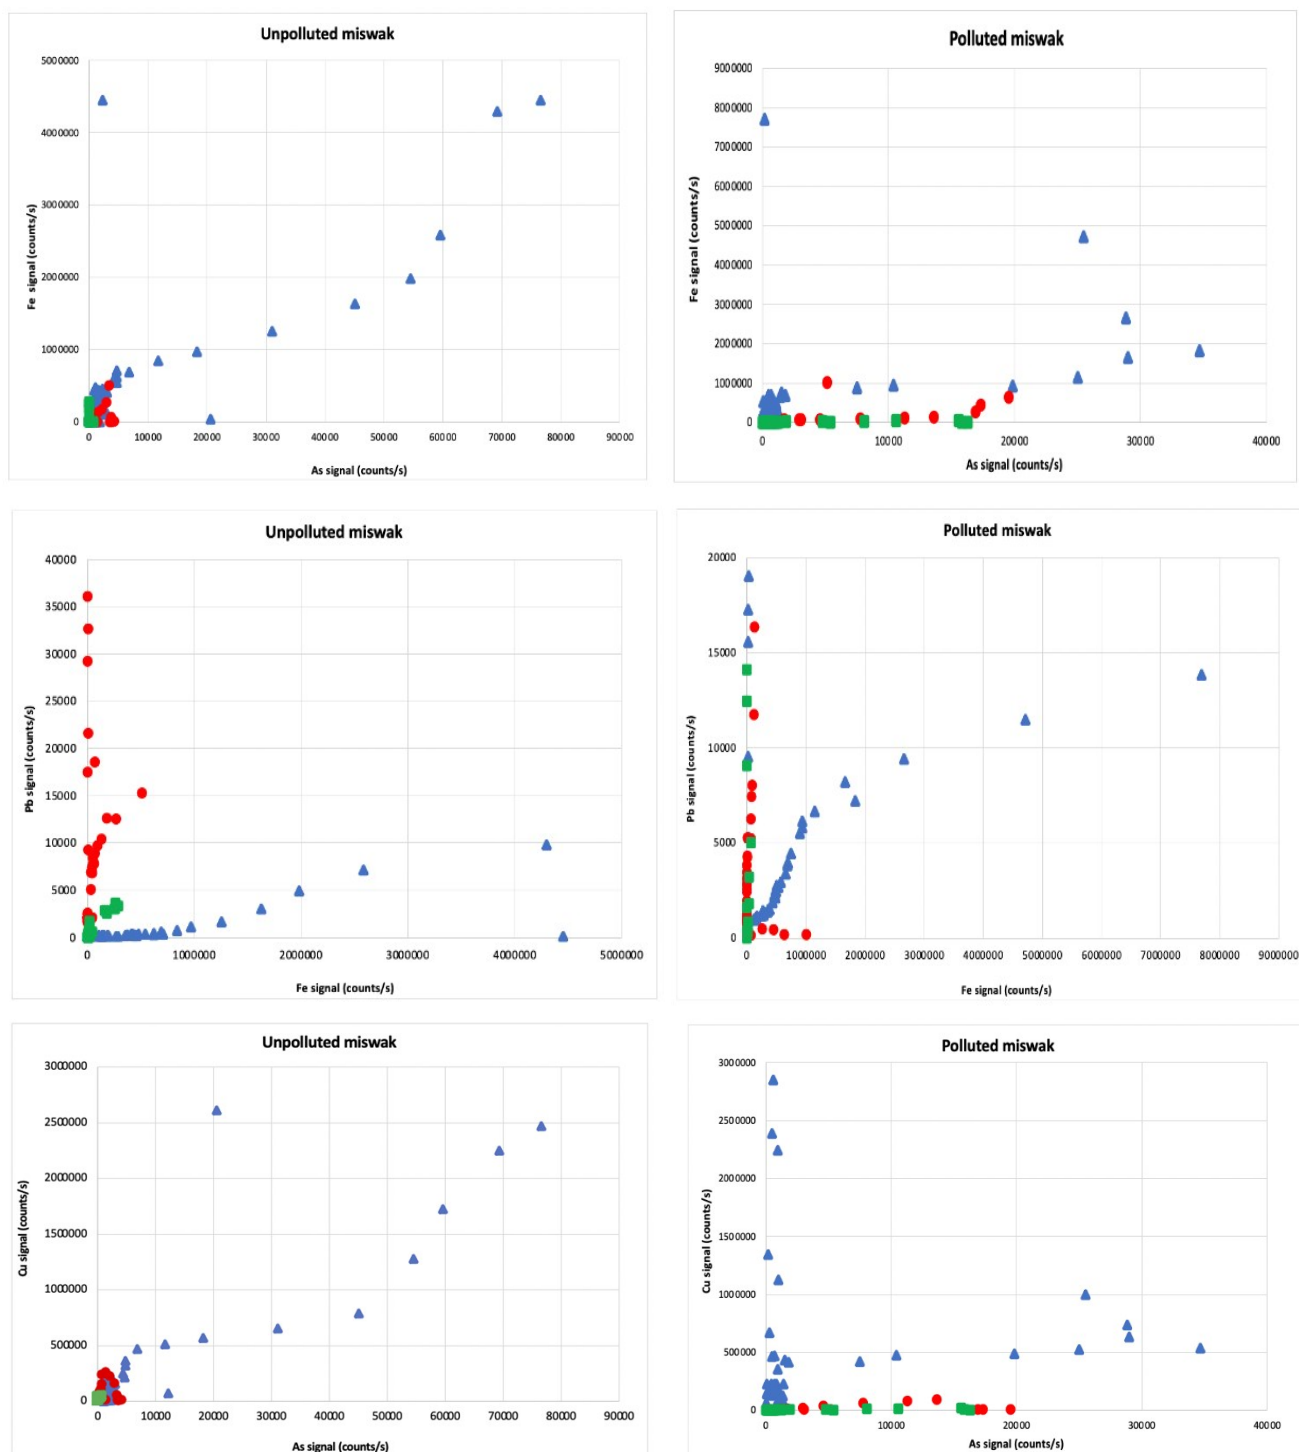

**Figure S5.** Correlation between the temporal profiles of some elements during on-line leaching with artificial saliva (blue triangles), gastric juice (red circles) and intestinal fluid (green squares) in unpolluted miswak (left) and polluted miswak (right).
